# Supplementary figures and images for: Self-assembly of organic acid–base compounds from 2-D layered network to 3-D supramolecular framework: synthesis, structure and photoluminescence
Source: Royal Society of Chemistry journal article supplement (doi:10.1039/b706485c), 2007-01-01

## Support information

### S-1. IR spectra of compounds 1–4.

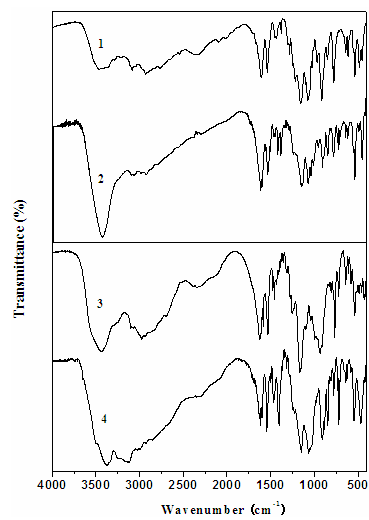

S-2. TGA diagrams of compounds 1–4.

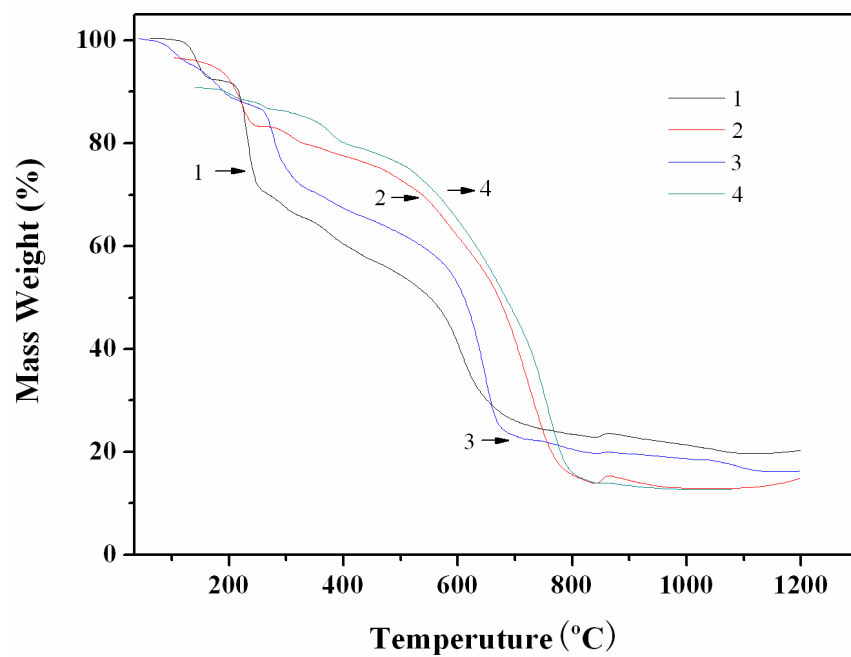

Supplement: b706485c.pdf [file b706485c.pdf]
